# Supplementary material for: Promoter Hypermethylation of ARID1A Gene Is Responsible for Its Low mRNA Expression in Many Invasive Breast Cancers
Source: PLoS One. 2013 Jan 21;8(1):e53931. doi: 10.1371/journal.pone.0053931 (PMC3549982; doi:10.1371/journal.pone.0053931)
Supplement: Table S3 — Real-time data of RNA expression and copy number variation. (XLS) [file pone.0053931.s003.xls]

## Sheet: Sheet1
Sample	Average fold change
	RNA expression	copy number variation
BC413	0.237896	0.539913
BC302	0.239708	0.782358
BC454	0.254625	1.51992
BC288	0.265879	1.80926
BC348	0.266477	0.680516
BC522	0.326602	1.02335
BC393	0.332701	0.780786
BC466	0.351039	6.60656
BC380	0.354722	1.25632
BC480	0.373014	0.714299
BC368	0.378653	1.04275
BC530	0.406168	4.10961
BC313	0.406168	1.20497
BC491	0.416826	0.261123
BC499	0.417153	4.23394
BC505	0.425153	1.18419
BC493	0.425804	1.89067
BC506	0.435188	0.742005
BC524	0.437944	1.06511
BC561	0.445284	2.15906
BC512	0.447714	0.820742
BC511	0.455714	0.898568
BC514	0.592928	0.183837
BC314	0.687188	0.868923
BC138	0.838481	1.80939
BC143	0.868983	0.756599
BC128	0.88307	0.773461
BC158	2.30071	1.27209
BC252	3.35552	1.06142
BC516	4.83193	1.10458
BC517	10.3923	1.96837
BC503	10.8607	0.26508
BC347	11.1703	1.93603
BC332	14.407	1.06356
BC396	15.5044	0.618781
BC386	17.1609	0.479399
BC520	17.3688	1.67958
BC376	20.0486	0.385874
